# Supplementary material for: Effects of Bacillus amyloliquefaciens LFB112 on Growth Performance, Carcass Traits, Immune, and Serum Biochemical Response in Broiler Chickens
Source: MDPI journal article supplement (doi:10.3390/antibiotics10111427), 2021-11-22
Supplement: s1 [file s1]

Supplementary

# Effects of *Bacillus amyloliquefaciens* LFB112 on Growth Performance, Carcass Traits, Immune, and Serum Biochemical Response in Broiler Chickens

Marhaba Ahmat <sup>1,2</sup>, Junhao Cheng <sup>1</sup>, Zaheer Abbas <sup>1</sup>, Qiang Cheng <sup>1</sup>, Zhen Fan <sup>3</sup>, Baseer Ahmad <sup>4</sup>, Min Hou <sup>2</sup>, Ghenijan Osman <sup>2</sup>, Henan Guo <sup>1</sup>, Junyong Wang <sup>1</sup> and Rijun Zhang <sup>1,\*</sup>

<sup>1</sup> Laboratory of Feed Biotechnology, State Key Laboratory of Animal Nutrition, College of Animal Science and Technology, China Agricultural University, Beijing 100193, China; malika511@126.com (M.A.); chengjunhao@cau.edu.cn (J.C.); Zaheerabbas113@yahoo.com (Z.A.); chengqiangcool@163.com (Q.C.); ghn\_657@cau.edu.cn (H.G.); wangjy9722@163.com (J.W.)

<sup>2</sup> Xinjiang Laboratory of Special Environmental Microbiology, Institute of Applied Microbiology, Xinjiang Academy of Agricultural Sciences, Urumqi 830091, China; hmde\_092@163.com (M.H.) ghenijan85@foxmail.com (G.O.)

<sup>3</sup> TECON Biology Company, LTD 528 Changchun South Road, Urumqi 830091, China; fanzhen1222@outlook.com

<sup>4</sup> Muhammad Nawaz Sharif University of Agriculture, Multan 25000, Pakistan; dr.baseerahmadkhan@gmail.com

\* Correspondence: zhangrj621@126.com

**Table S1.** Effect of *Bacillus amyloliquefaciens* LFB112 on immune organ index (g/kg) of broilers.<sup>1</sup>

| Item               | Treatment <sup>2</sup> |         |        |        |        |        | SEM   | P-value |
|--------------------|------------------------|---------|--------|--------|--------|--------|-------|---------|
|                    | CON                    | AB      | C+M    | C      | M      | CICC   |       |         |
|                    |                        |         |        | 21 d   |        |        |       |         |
| Thymus             | 2.42c                  | 2.75abc | 3.17a  | 3.02ab | 2.35c  | 2.50bc | 0.009 | 0.032   |
| Bursa of Fabricius | 2.48bc                 | 2.68ab  | 2.65ab | 2.73ab | 2.17c  | 2.07c  | 0.008 | 0.031   |
| Spleen             | 1.00b                  | 1.28a   | 1.00b  | 1.33a  | 0.77c  | 0.97bc | 0.004 | <0.001  |
|                    |                        |         |        | 39 d   |        |        |       |         |
| Thymus             | 2.18abc                | 2.53a   | 2.50a  | 2.65a  | 2.30ab | 1.72c  | 0.008 | 0.003   |
| Bursa of Fabricius | 2.18abc                | 1.97ab  | 1.90ab | 2.02ab | 2.12a  | 1.60b  | 0.006 | 0.041   |
| Spleen             | 1.10bc                 | 1.32ab  | 1.48a  | 0.97c  | 0.98c  | 1.07bc | 0.005 | <0.001  |

SEM=standard error of the mean. <sup>a-c</sup> Within a row, numbers with different superscripts differ statistically at  $P<0.05$ . <sup>1</sup> Six replicates per treatment group ( $n=6$ ). <sup>2</sup> Dietary treatments were as follows: CON= basal diet; AB (Antibiotics)=basal diet +aureomycin150 mg/kg; C+M=basal diet + LFB112 fermentation dry powder with *Bacillus* cell +metabolite ( $5\times 10^8$  CFU/g); C=basal diet+LFB112 *Bacillus* cells powder with removed metabolite ( $5\times 10^8$  CFU/g); M=basal diet+LFB112 metabolite powder with removed *Bacillus* cells ( $5\times 10^8$  CFU/g); CICC=basal diet +*Bacillus Subtilis* 20179 ( $5\times 10^8$  CFU/g).

**Table S2.** Effect of *Bacillus amyloliquefaciens* LFB112 on serum immune factors (g/L) of broiler <sup>1</sup>.

| Item | Treatment <sup>2</sup> |       |        |        |        |        | SEM   | P-value |
|------|------------------------|-------|--------|--------|--------|--------|-------|---------|
|      | CON                    | AB    | C+M    | C      | M      | CICC   |       |         |
|      |                        |       |        | 21 d   |        |        |       |         |
| IgA  | 0.97ab                 | 0.89b | 1.05a  | 1.04a  | 0.96ab | 0.86b  | 0.017 | 0.002   |
| IgG  | 6.61bc                 | 5.91c | 7.80ab | 8.50a  | 7.01bc | 7.23b  | 0.182 | <0.001  |
| IgM  | 0.90ab                 | 0.76b | 0.94ab | 0.88ab | 1.04a  | 0.82b  | 0.023 | 0.004   |
|      |                        |       |        | 39 d   |        |        |       |         |
| IgA  | 1.02a                  | 0.86b | 1.20ab | 1.18ab | 1.09ab | 1.03ab | 0.034 | 0.027   |
| IgG  | 7.65ab                 | 6.42b | 8.24a  | 8.07a  | 8.04a  | 7.35ab | 0.150 | 0.001   |
| IgM  | 0.95                   | 0.85  | 0.99   | 1.07   | 0.84   | 0.95   | 0.026 | 0.077   |

SEM=standard error of the mean. Ig = immunoglobulin. <sup>a-c</sup>Different superscripts within a row shows significant difference ( $P < 0.05$ ). <sup>1</sup> Number of replicates per group (n =6). <sup>2</sup> Experimental group assigned were: CON= basal diet; AB (Antibiotics)=basal diet +aureomycin150 mg /kg; C+M=basal diet + LFB112 fermentation dry powder with *Bacillus* cell + metabolite ( $5 \times 10^8$  CFU/g); C=basal diet+LFB112 *Bacillus* cells powder with removed metabolite ( $5 \times 10^8$  CFU/g); M=basal diet+LFB112 metabolite powder with removed *Bacillus* cells ( $5 \times 10^8$  CFU/g); CICC=basal diet+ *Bacillus subtilis* 20179 ( $5 \times 10^8$  CFU/g).
